# Supplementary material for: BTK Isoforms p80 and p65 Are Expressed in Head and Neck Squamous Cell Carcinoma (HNSCC) and Involved in Tumor Progression
Source: MDPI journal article supplement (doi:10.3390/cancers15010310), 2023-01-03
Supplement: s1 [file s1]

# Supplementary Material

## BTK Isoforms p80 and p65 Are Expressed in Head and Neck Squamous Cell Carcinoma (HNSCC) and Involved in Tumor Progression

Annika C. Betzler <sup>1</sup>, Hannah Strobel <sup>1</sup>, Tsima Abou Kors <sup>1</sup>, Jasmin Ezić <sup>1</sup>, Kristina Lesakova <sup>1</sup>, Ronja Pscheid <sup>1</sup>, Ninel Azoitei <sup>2</sup>, Johanna Sporleder <sup>1</sup>, Anna-Rebekka Staufenberg <sup>1</sup>, Robert Drees <sup>1</sup>, Stephanie E. Weissinger <sup>3</sup>, Jens Greve <sup>1</sup>, Johannes Doescher <sup>1</sup>, Marie-Nicole Theodoraki <sup>1</sup>, Patrick J. Schuler <sup>1</sup>, Simon Laban <sup>1</sup>, Toshiro Kibe <sup>4</sup>, Michiko Kishida <sup>4</sup>, Shosei Kishida <sup>4</sup>, Christian Idel <sup>5</sup>, Thomas K. Hoffmann <sup>1</sup>, Marialuisa Lavitrano <sup>6</sup>, Emanuela Grassilli <sup>6</sup> and Cornelia Brunner <sup>1,\*</sup>

<sup>1</sup> Department of Oto-Rhino-Laryngology, Ulm University Medical Center, 89075, Ulm, Germany;

<sup>2</sup> Department of Internal Medicine I, Ulm University Medical Center, 89081, Ulm, Germany;

<sup>3</sup> Institute of Pathology, Ulm University Medical Center, 89081, Ulm, Germany;

<sup>4</sup> Department of Biochemistry and Genetics, Graduate School of Medical and Dental Sciences, Kagoshima University, 890-8580, Kagoshima, Japan;

<sup>5</sup> Department of Otorhinolaryngology, University of Luebeck and University Hospital Schleswig-Holstein, Campus Luebeck, 23538, Luebeck Germany

<sup>6</sup> School of Medicine and Surgery, University of Milano-Bicocca, 20900, Monza, Italy;

\* Correspondence: cornelia.brunner@uniklinik-ulm.de

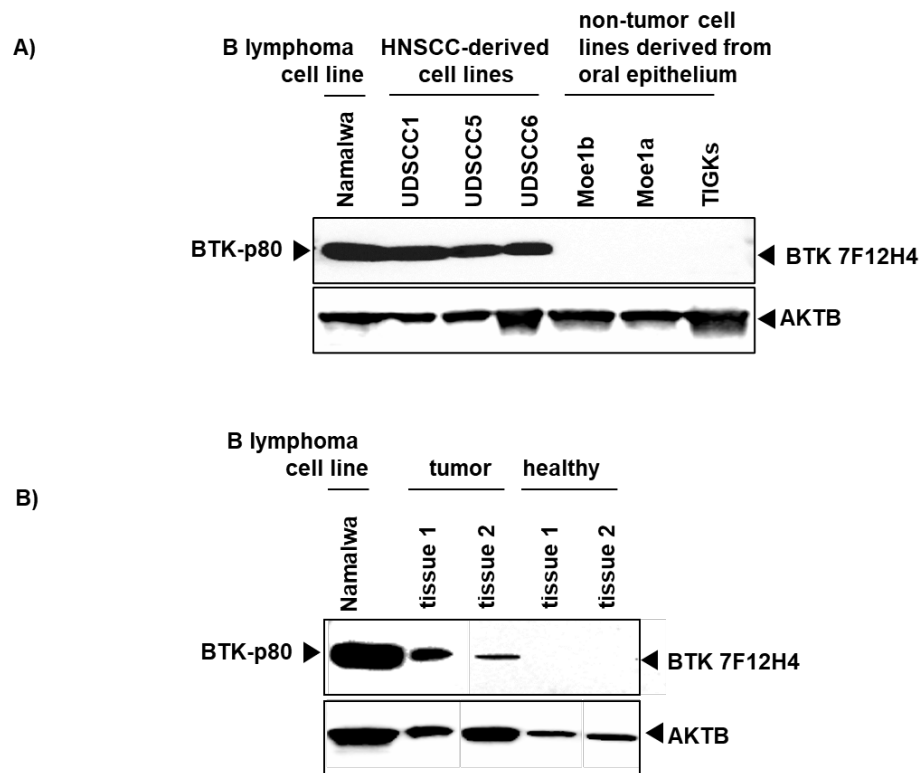

**Figure S1:** (A) Expression of BTK-p80 isoform was determined in one B cell lymphoma cell line (Namalwa), three HNSCC-derived cell lines (UDSCC1, UDSCC5, UDSCC6) as well as in non-tumor cell lines derived from oral epithelium (Moe1a, Moe1b, TIGK) by immunoblotting using BTK antibody 7F12H4. (B) Expression of BTK-p80 was determined in primary cancer tissue specimens of the head and neck region and in healthy non-tumor squamous epithelial cells obtained from the same individuals using BTK antibody 7F12H4.  $\beta$ -actin was used as loading control.

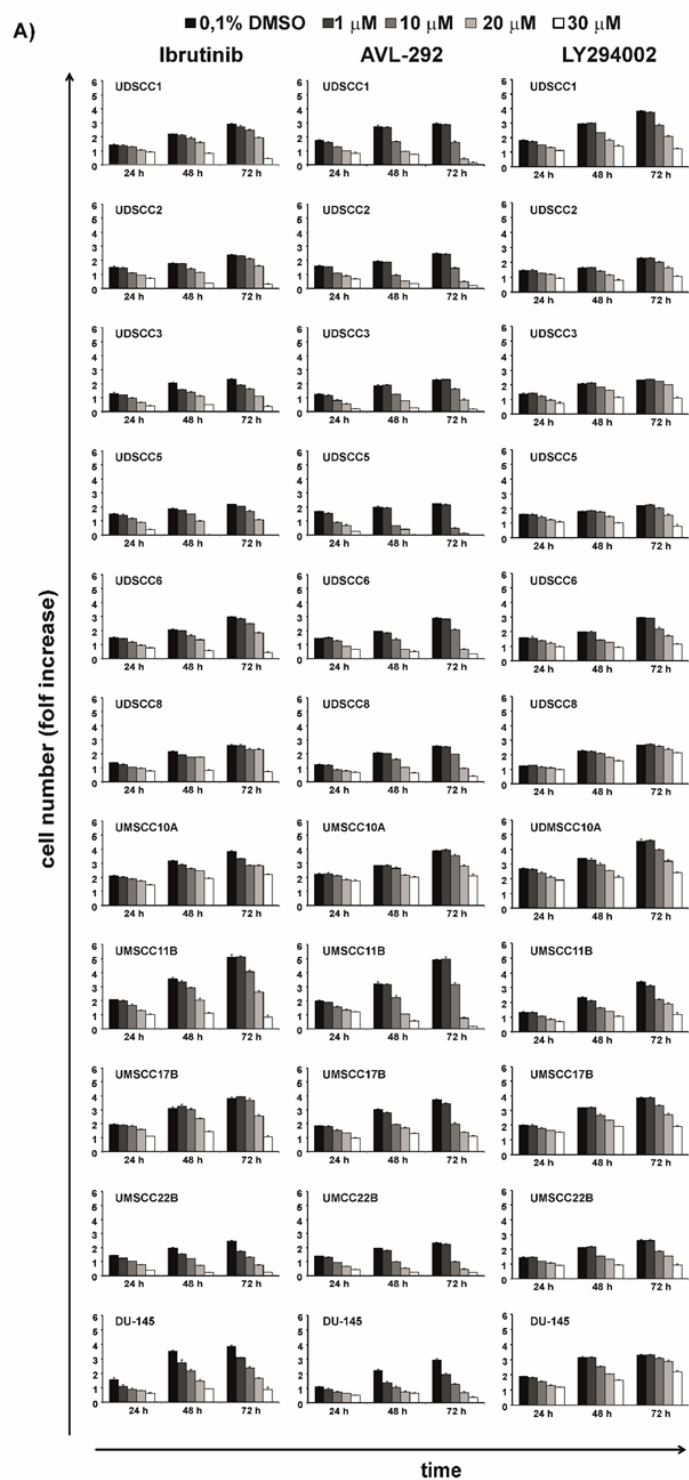

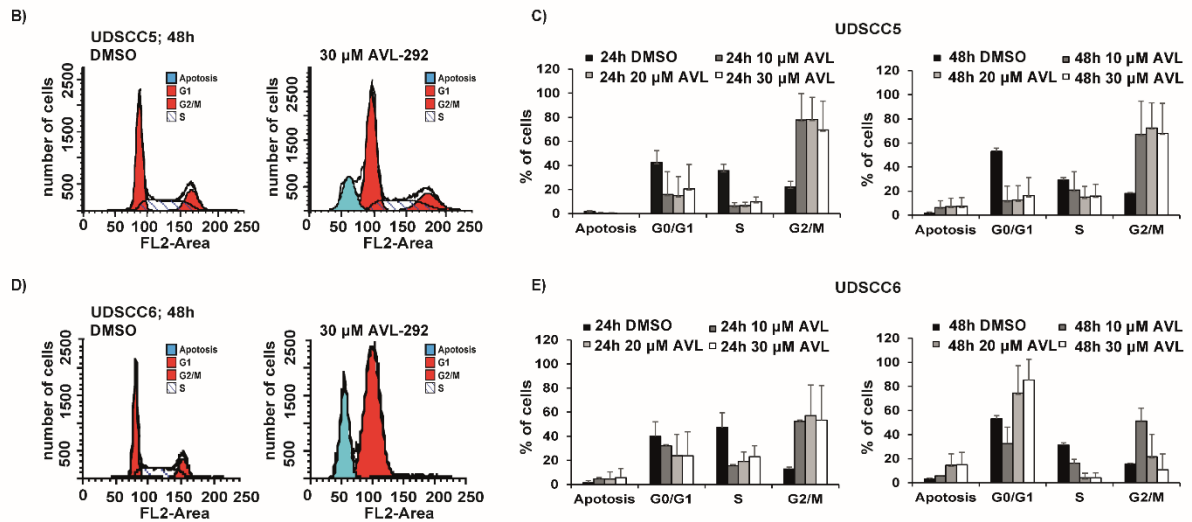

**Figure S2:** BTK inhibition impairs proliferation and induces cell cycle arrest and apoptosis. (A) BTK inhibition decreased proliferation of HNSCC-derived cell lines. Ten HNSCC-derived cell lines and the prostate carcinoma cell line DU-145 were seeded and treated with different concentrations (1, 10, 20 and 30  $\mu$ M) of three different BTK inhibitors (Ibrutinib, AVL-292 and LY294002). Treatment with 0.1 % DMSO served as control. Proliferation was assessed over a time. This experiment was performed in triplicates. Presented are the mean values. (B-E) BTK inhibition induces cell cycle arrest and apoptosis. Cell cycle and apoptosis were analyzed using UDSCC5 (B, C) or UDSCC6 (D, E) cells that were either left untreated (DMSO control) or treated with different concentrations (10, 20 or 30  $\mu$ M) of AVL-292. Cell cycle and apoptosis was assessed 24h and 48h after treatment. Representative graphs of cell cycle analyses are shown in D and F. Depicted in E and G are mean values  $\pm$  SD of three independent experiments.

Original blots of Figure 1F

|                                                                                     |                                                                              |                                                                                                                                                                                                          |
|-------------------------------------------------------------------------------------|------------------------------------------------------------------------------|----------------------------------------------------------------------------------------------------------------------------------------------------------------------------------------------------------|
| 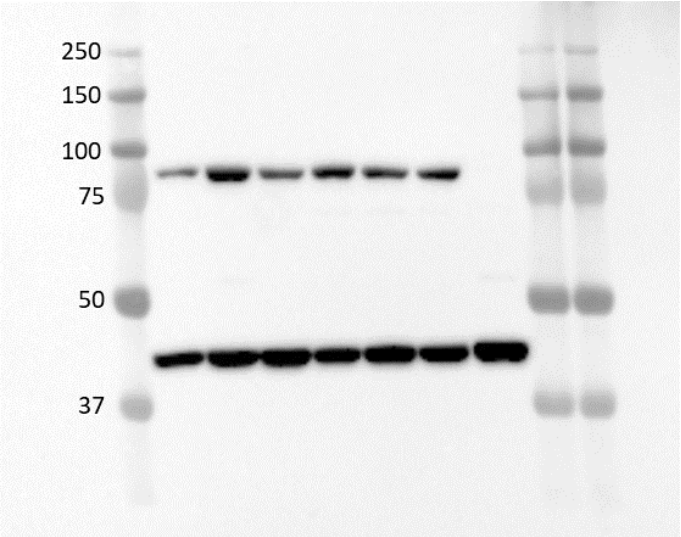   | <p><b>BTK 7F12H4</b><br/>(80 kDa)</p> <p><b>β-actin</b><br/>(42 kDa)</p>     | <p>Lane 1: Marker<br/>Lane 2: UD-SCC1<br/>Lane 3: UD-SCC5<br/>Lane 4: UD-SCC6<br/>Lane 5: Ramos<br/>Lane 6: Namalwa<br/>Lane 7: Preb1<br/>Lane 8: CD19+ cells<br/>Lane 9: Marker<br/>Lane 10: Marker</p> |
|   | <p><b>BTK DFS</b><br/>(80 and 77 kDa)</p> <p><b>β-actin</b><br/>(42 kDa)</p> |                                                                                                                                                                                                          |
|  | <p><b>β-actin</b><br/>(42 kDa)</p>                                           |                                                                                                                                                                                                          |

Original blots of Figure 1G (right panel)

|                                                                                     |                                   |                                                                                                                                                                                                                                                                                |
|-------------------------------------------------------------------------------------|-----------------------------------|--------------------------------------------------------------------------------------------------------------------------------------------------------------------------------------------------------------------------------------------------------------------------------|
|    | <b>BTK 7F12H4</b><br>(80 kDa)     | Lane 1: Marker<br>Lane 2: Namalwa<br>Lane 3: UD-SCC1<br>Lane 4: UD-SCC2<br>Lane 5: UD-SCC3<br>Lane 6: UD-SCC5<br>Lane 7: UD-SCC6<br>Lane 8: UD-SCC8<br>Lane 9: UD-SCC10A<br>Lane 10: UM-SCC11B<br>Lane 11:UM-SCC17B<br>Lane 12:UM-SCC22B<br>Lane 13: Marker<br>Lane 14: Marker |
|   | <b>BTK DFS</b><br>(80 and 77 kDa) |                                                                                                                                                                                                                                                                                |
|  | <b>GAPDH</b><br>(37 kDa)          |                                                                                                                                                                                                                                                                                |

Original blots of Figure 1G (left panel)

|                                                                                     |                                   |                                                                                                                                                                                                                                                                                                                            |
|-------------------------------------------------------------------------------------|-----------------------------------|----------------------------------------------------------------------------------------------------------------------------------------------------------------------------------------------------------------------------------------------------------------------------------------------------------------------------|
| 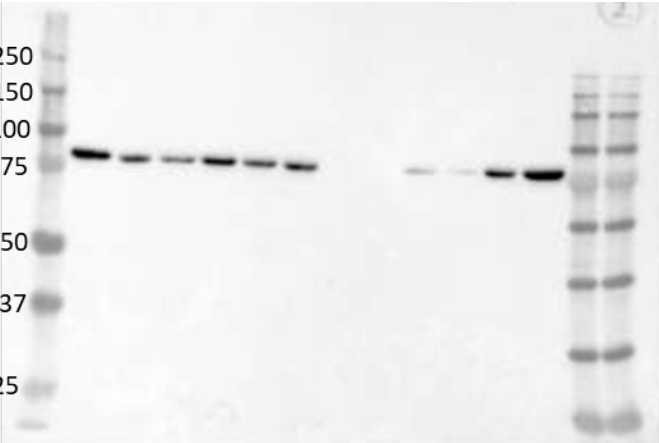   | <b>BTK 7F12H4</b><br>(80 kDa)     | Lane 1: Marker<br>Lane 2: Namalwa<br>Lane 3: not of interest<br>Lane 4: not of interest<br>Lane 5: DU-145<br>Lane 6: LNCaP<br>Lane 7: PC-3<br>Lane 8: not of interest<br>Lane 9: not of interest<br>Lane 10: not of interest<br>Lane 11: not of interest<br>Lane 12: not of interest<br>Lane 13: Marker<br>Lane 14: Marker |
|   | <b>BTK DFS</b><br>(80 and 77 kDa) |                                                                                                                                                                                                                                                                                                                            |
|  | <b>GAPDH</b><br>(37 kDa)          |                                                                                                                                                                                                                                                                                                                            |

**Original blots of Figure 1H**

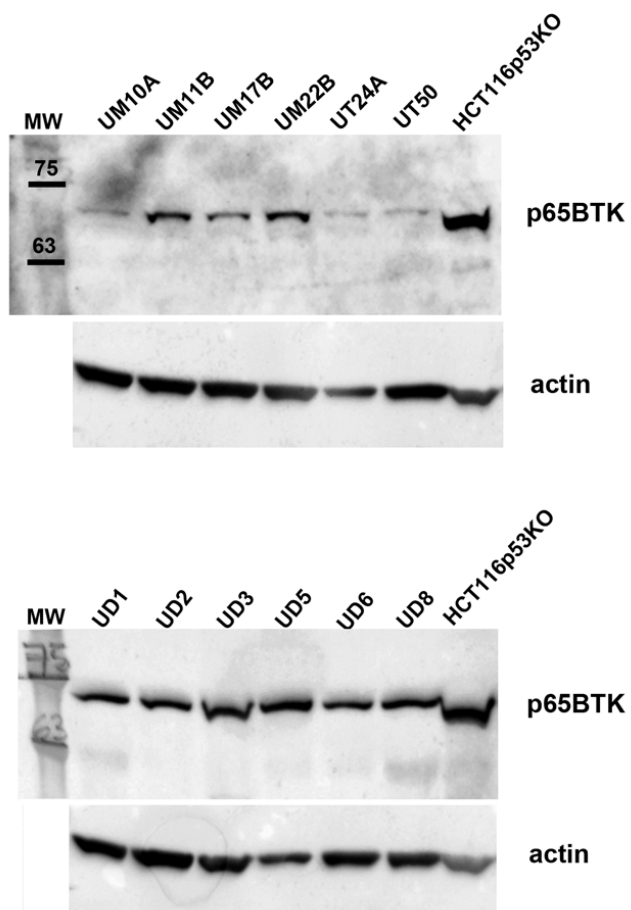

**Figure S3:** Original membranes of immunoblots shown in Figure 1 F-H.



**UD-SCC1**

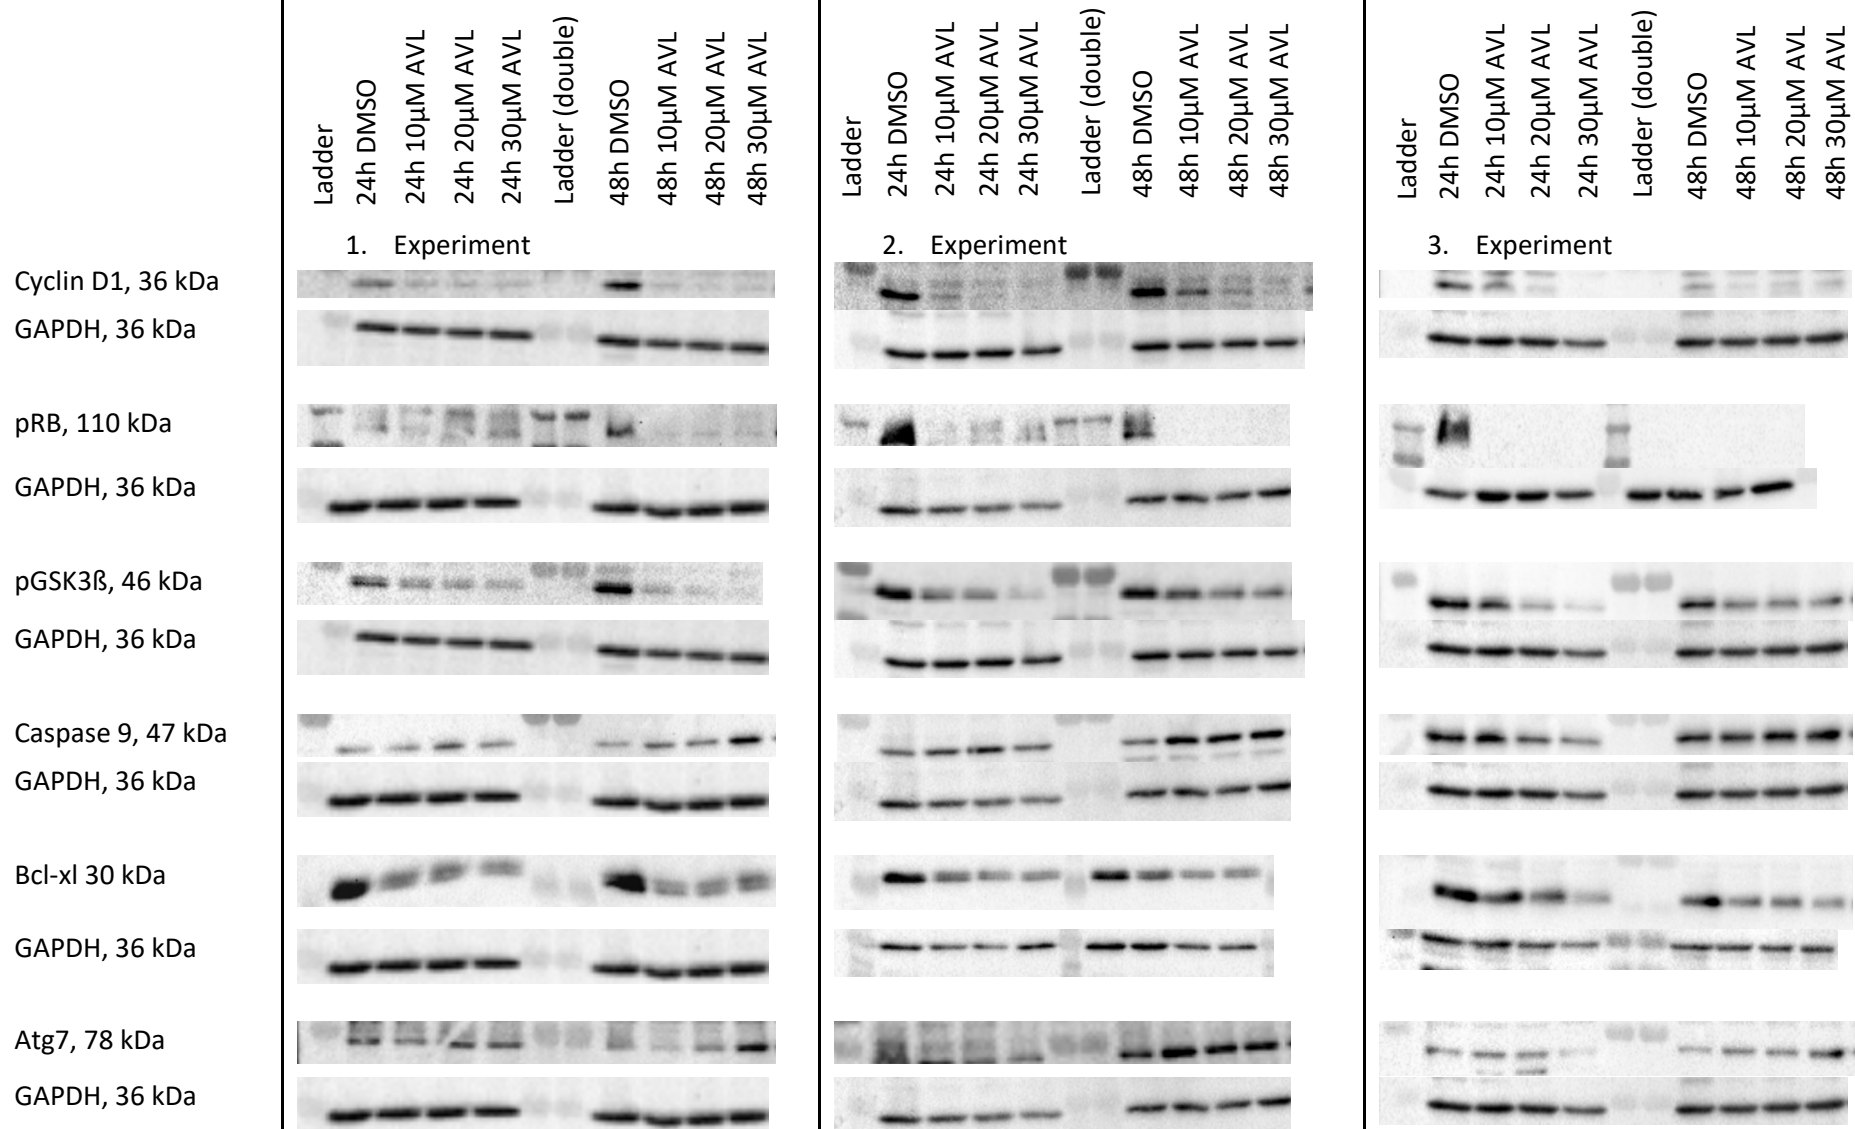

UD-SCC1

LC3A/B I, 17 kDa  
LC3A/B II, 14 kDa  
GAPDH, 36 kDa

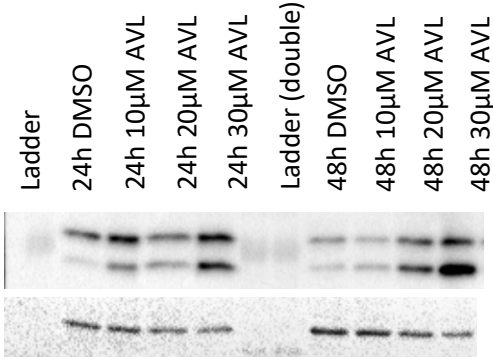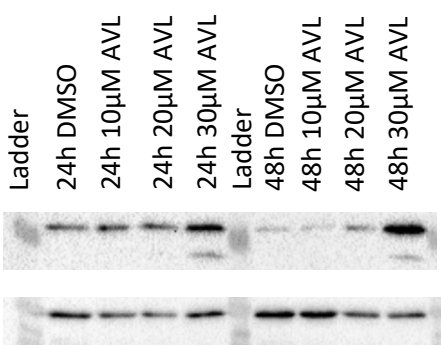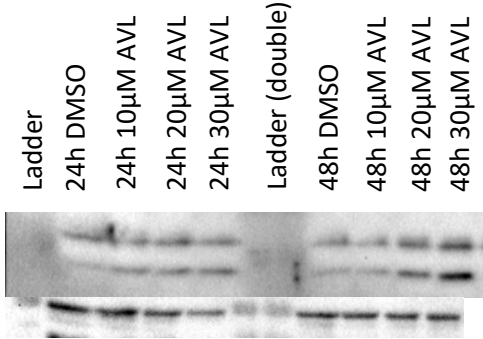

UD-SCC 2

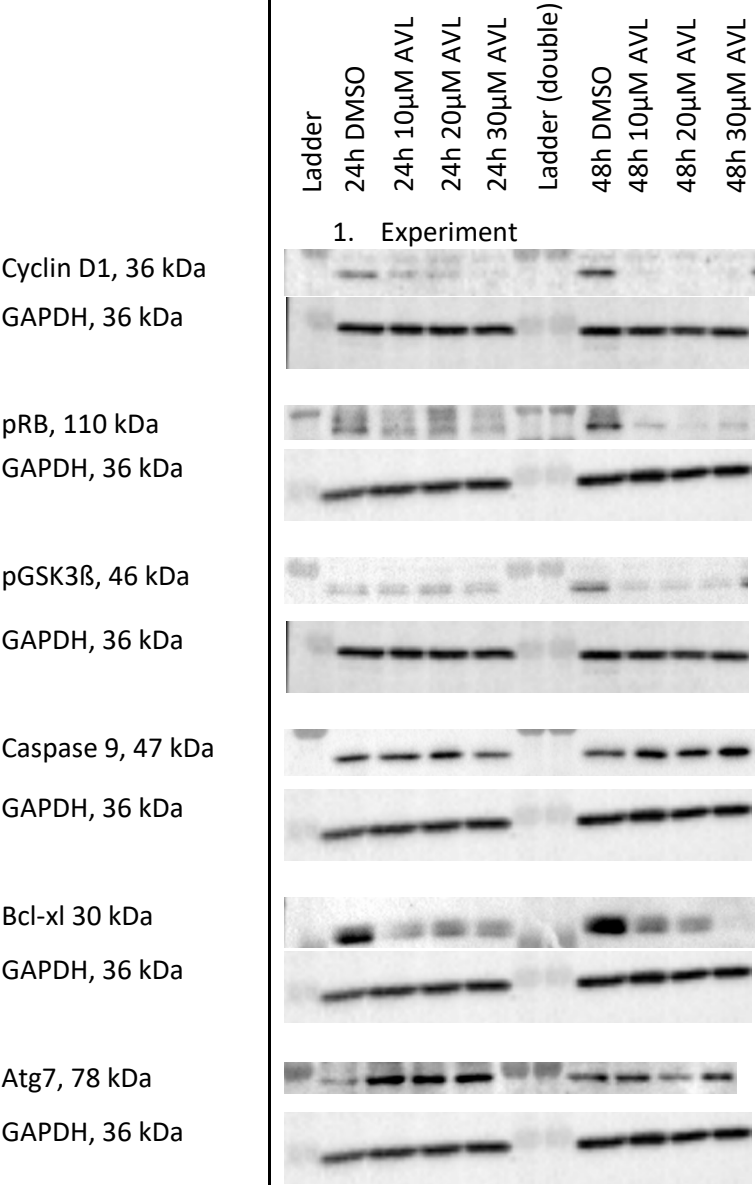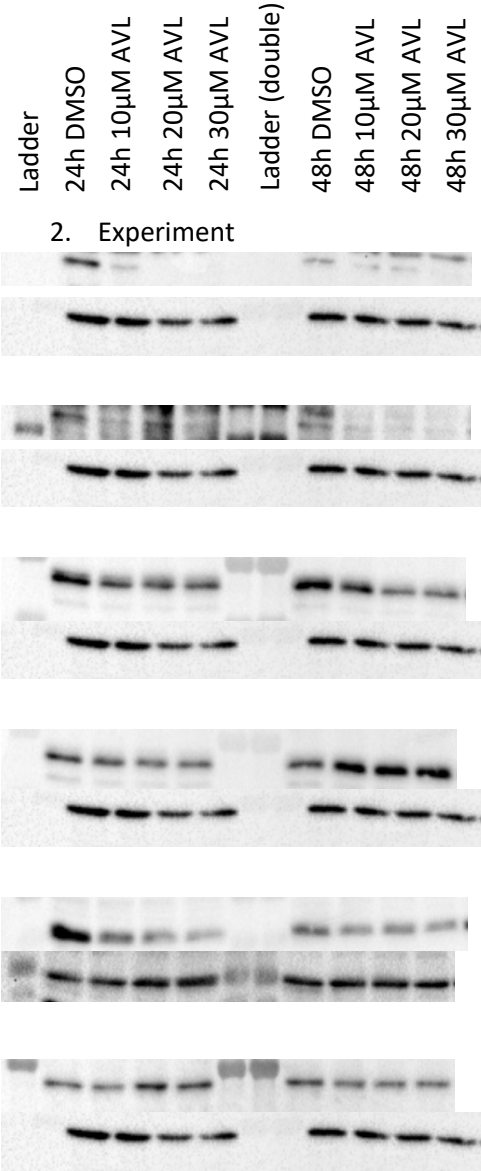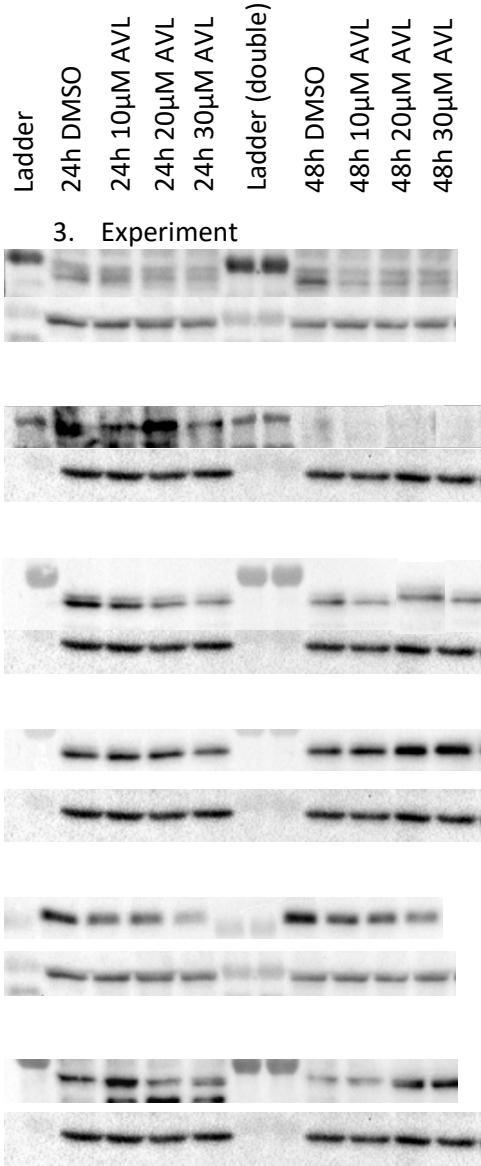

UD-SCC 2

LC3A/B I, 17 kDa  
LC3A/B II, 14 kDa  
GAPDH, 36 kDa

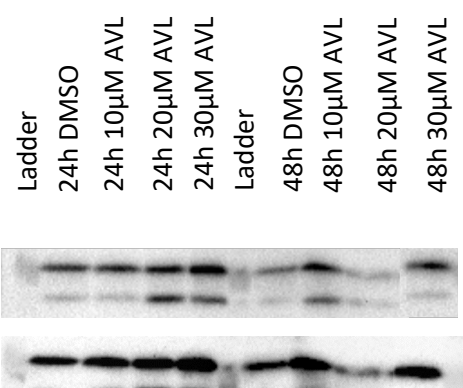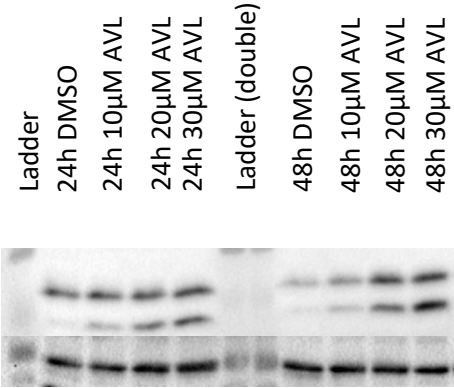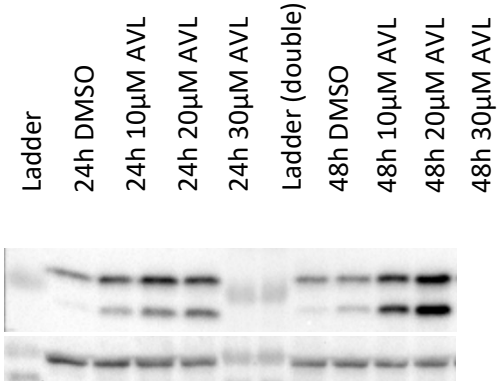

UD-SCC 6

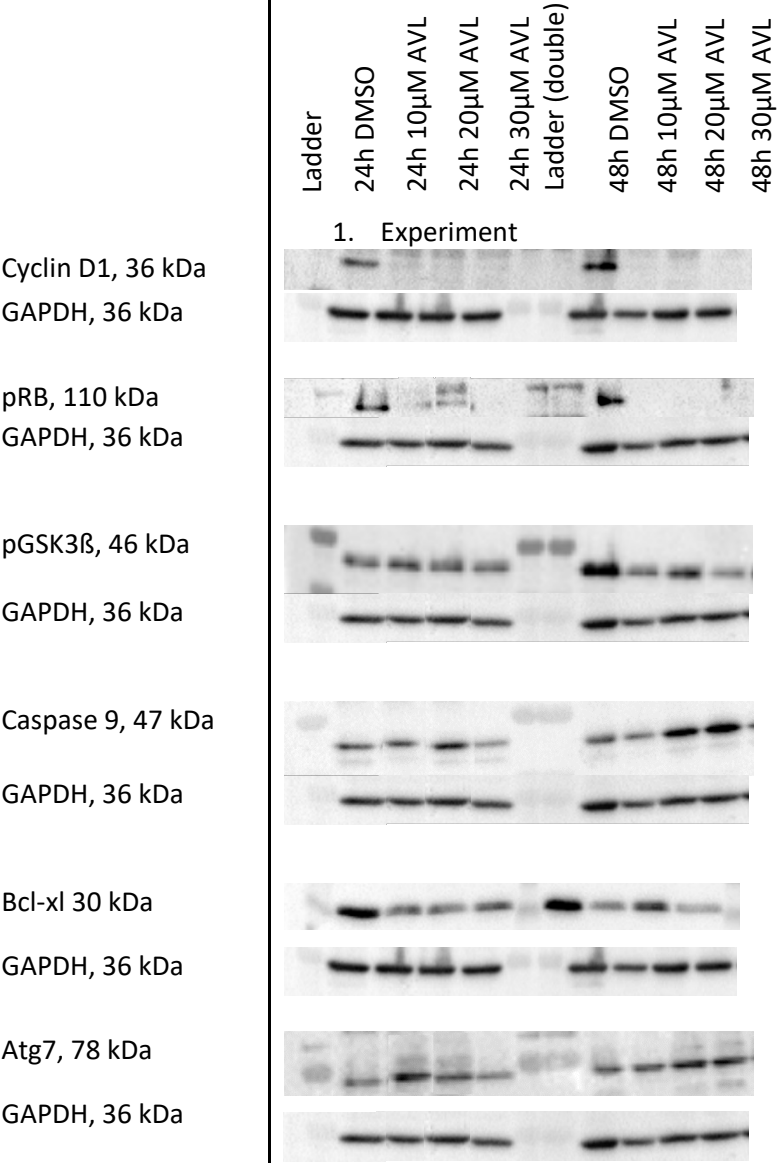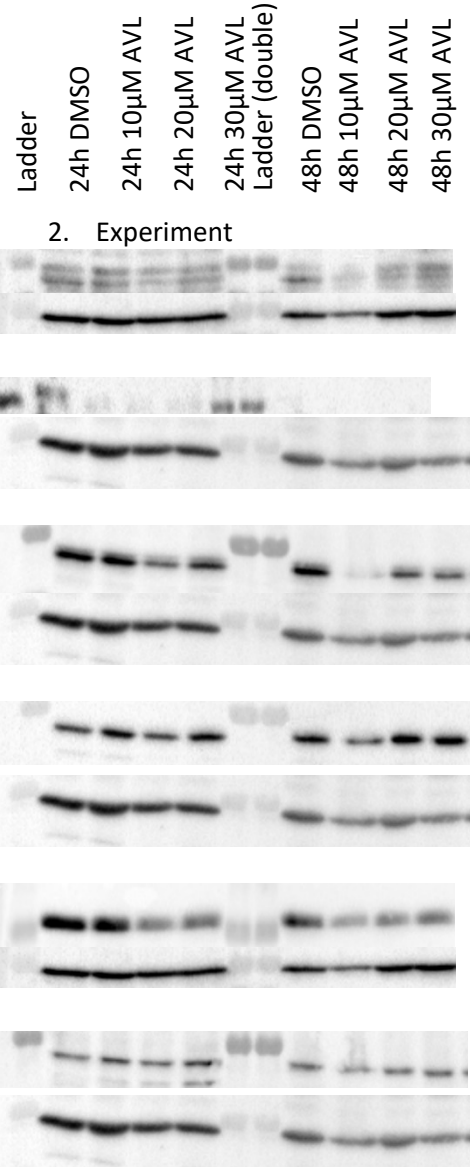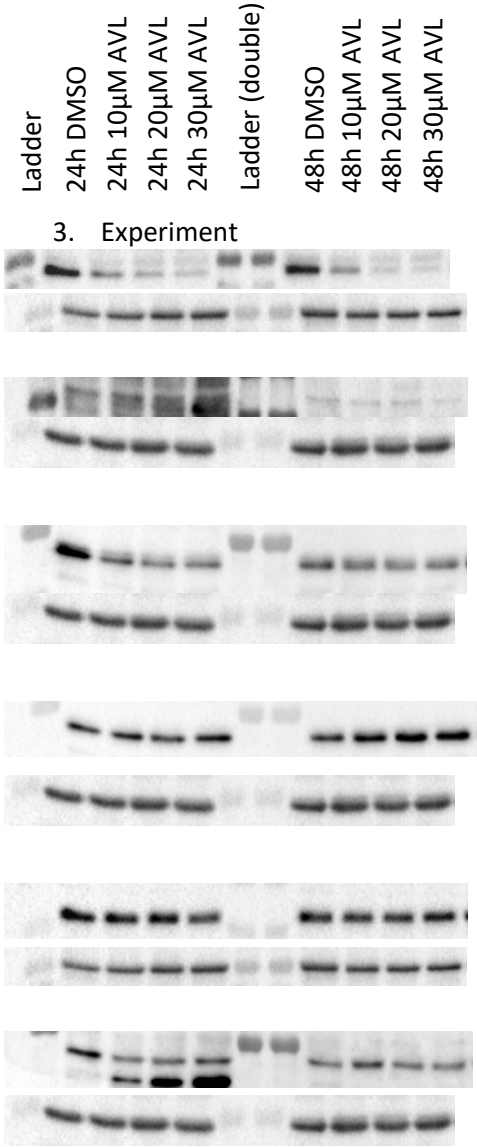

UD-SCC 6

LC3A/B I, 17 kDa  
LC3A/B II, 14 kDa  
GAPDH, 36 kDa

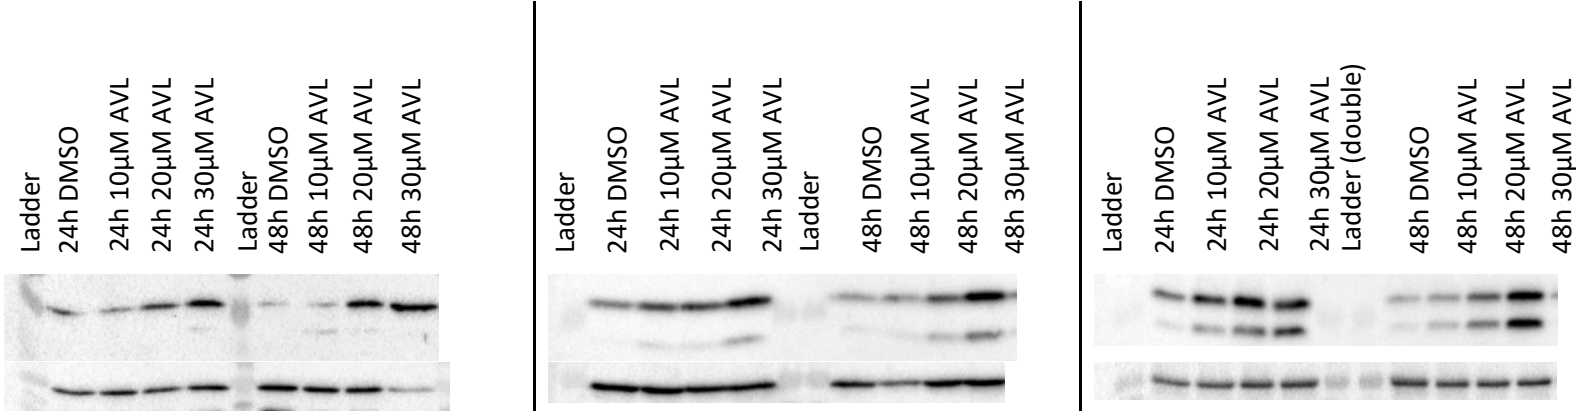

Figure S4: Original membranes of immunoblots shown in Figure 3.

# Original blots of Figure 5A

|                                                                                    |                                       |                                                                                                                                                                                                               |
|------------------------------------------------------------------------------------|---------------------------------------|---------------------------------------------------------------------------------------------------------------------------------------------------------------------------------------------------------------|
| 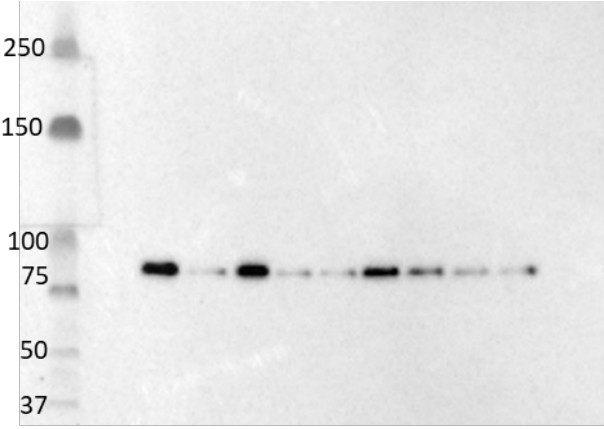  | <p><b>BTK 7F12H4</b><br/>(80 kDa)</p> | <p>Lane 1: Marker<br/>Lane 2: Scr 1<br/>Lane 3: BTK 1<br/>Lane 4: Scr OZ 1<br/>Lane 5: BTK OZ 1<br/>Lane 6: BTK PB 1<br/>Lane 7: Scr OZ 5<br/>Lane 8: BTK OZ 5<br/>Lane 9: Scr PB 6<br/>Lane 10: BTK PB 6</p> |
|  | <p><b>GAPDH</b><br/>(37 kDa)</p>      |                                                                                                                                                                                                               |

**Figure S5:** Original membranes of immunoblots shown in Figure 5A.

Original blots of Figure S1A

|                                                                                    |                               |                                                                                                                                                                                                                      |
|------------------------------------------------------------------------------------|-------------------------------|----------------------------------------------------------------------------------------------------------------------------------------------------------------------------------------------------------------------|
| 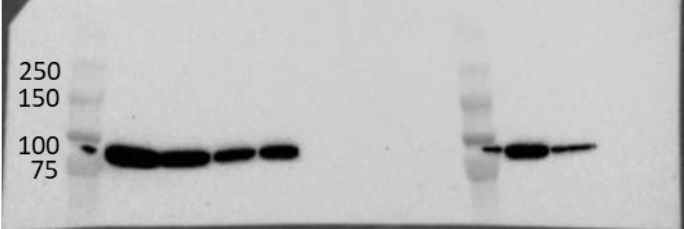  | <b>BTK 7F12H4</b><br>(80 kDa) | Lane 1: Marker<br>Lane 2: Namalwa<br>Lane 3: UDSCC1<br>Lane 4: UDSCC5<br>Lane 5: UDSCC6<br>Lane 6: Moe1b<br>Lane 7: Moe1a<br>Lane 8: TIGKs<br>Lane 9: marker<br>Lane 10: not of interest<br>Lane 11: not of interest |
|  | <b>β-actin</b><br>(42 kDa)    |                                                                                                                                                                                                                      |



**Original blots of Figure S1B**

|                                                                                    |                                       |                                                                                                                                                                                                                                      |
|------------------------------------------------------------------------------------|---------------------------------------|--------------------------------------------------------------------------------------------------------------------------------------------------------------------------------------------------------------------------------------|
| 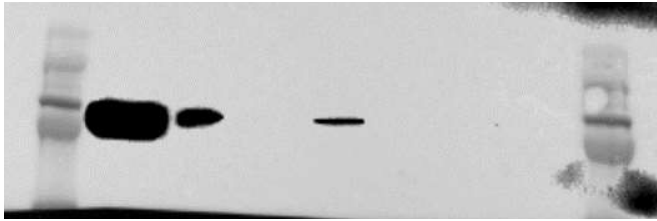  | <p><b>BTK 7F12H4</b><br/>(80 kDa)</p> | <p>Lane 1: Marker<br/>Lane 2: Namalwa<br/>Lane 3: tumor tissue 1<br/>Lane 4: tumor tissue 3<br/>Lane 5: tumor tissue 2<br/>Lane 6: healthy tissue 1<br/>Lane 7: healthy tissue 3<br/>Lane 8: healthy tissue 2<br/>Lane 9: marker</p> |
|  | <p><b>β-actin</b><br/>(42 kDa)</p>    |                                                                                                                                                                                                                                      |

**Figure S6:** Original membranes of immunoblots shown in Figure S1.

**Table S1: HNSCC cell lines**

| Cell line | Sex | Site of origin | TNM stage | HPV 16 status | TP53 gene mutation       |
|-----------|-----|----------------|-----------|---------------|--------------------------|
| UDSCC1    | M   | Oropharynx     | T3N2bM0   | -             | Skip exon 3              |
| UDSCC2    | M   | Hypopharynx    | T1N2M0    | +             | wt                       |
| UDSCC3    | M   | Larynx         | T2N2cM0   | -             | Nonsense, p.224Glu->Stop |
| UDSCC5    | M   | Larynx         | T1N1M0    | -             | Missense, p.179His->Tyr  |
| UDSCC6    | M   | Oropharynx     | T2N0M0    | -             | Missense, p.220Tyr->Cys  |
| UDSCC8    | /   | Larynx         | /         | -             | Missense, p.155Thr->Asn  |
| UMSCC10A  | M   | Larynx         | T3N0M0    | -             | Missense, p.245Gly->Cys  |
| UMSCC11B  | M   | Larynx         | T2N2aM0   | -             | Missense, p.242Cys->Ser  |
| UMSCC17B  | F   | Larynx         | T1N0M0    | -             | wt                       |
| UMSCC22B  | F   | Hypopharynx    | T2N1M0    | -             | Missense, p.220Tyr->Cys  |

**Table S2: Non-tumor oral epithelial cell lines**

| Cell line   | Sex         | Site of origin         | Reference |
|-------------|-------------|------------------------|-----------|
| Moe1a       | unspecified | Oral epithelium        | [27]      |
| Moe1b       | unspecified | Oral epithelium        | [27]      |
| hTERT TIGKs | M           | Gingiva;<br>Epithelium | [28]      |

**Table S3: Clinical data of patient samples**

| Patient | Sex | Site of origin | TNM stage | HPV status |
|---------|-----|----------------|-----------|------------|
| 1       | M   | Oral cavity    | T2N0M0    | n.a.       |
| 2       | M   | Oral cavity    | T2N0M0    | n.a.       |
